# Supplementary material for: Design and synthesis of mechanochromic poly(ether-ester-urethane) elastomer with high toughness and resilience mediated by crystalline domains
Source: Royal Society of Chemistry journal article supplement (doi:10.1039/d2py00085g), 2022-01-01
Supplement: d2py00085g1.pdf [file d2py00085g1.pdf]

## Supporting information

### Design and synthesis of mechanochromic poly(ether-ester-urethane) elastomer with high toughness and resilience mediated by crystalline domains

Wenwen Wang, Manli Li, Pengcheng Zhou, Zhong Yan, Dong Wang\*

*Key Laboratory of Textile Fiber and Products (Wuhan Textile University), Ministry of Education, Hubei International Scientific and Technological Cooperation Base of Intelligent Textile Materials & Application, Wuhan Textile University, Wuhan 430200, China*

#### Chemicals

Poly(tetramethylene glycols) (PTMG,  $M_n = 850$  g/mol · 1000 g/mol and 2000 g/mol), 2-bromoethanol (purity: 95%) and hexamethylene diisocyanate (HDI, purity: 99%) were purchased from Aladdin (China). 2,3,3-Trimethylindolenine (purity: 97%) and 3-chloromethyl-5-nitrosalicylaldehyde (purity: 97%) were purchased from TCI. Dimethyl terephthalate (DMT, purity: 99%) and zinc acetate solution (AR) were purchased from Sigma-Aldrich. 1,4-Butanediol (BDO, purity: 99%), tetrabutylorthotitanate (purity: 98%), acetonitrile (purity: 99.5%), potassium hydroxide (KOH, purity: 95%) and dibutyltin dilaurate (DBTDL, purity: 90%) were purchased from Sinopharm. PTMG was heated at 110 °C under vacuum and stirred for 2 h to remove the moisture before use. Other chemicals were used without further purification.

**Synthesis of spiropyran diol.** 2,3,3-Trimethylindolenine and bromoethanol were dissolved in acetonitrile solution, stirred and refluxed for 24 hours, then washed with ether to obtain **indole (1)**. Indole 1 reacted with potassium hydroxide and distilled water at room temperature for 2 hours to give **indole (2)**. Hydrolysis of 3-chloromethyl-5-nitrosalicylaldehyde gave methylhydroxy substituted **salicylaldehyde (3)** in good yield after recrystallization from water. **Spiropyran (4)** was prepared by condensation of 1 and 3 in refluxing 50% aqueous ethanol, which gave the product as a precipitate. The photochrome was recrystallized from acetonitrile and water volume ratio of 7:3 as raw

---

\*Corresponding author. Email: wangdon08@126.com.

material, which gave the pure photochrome.

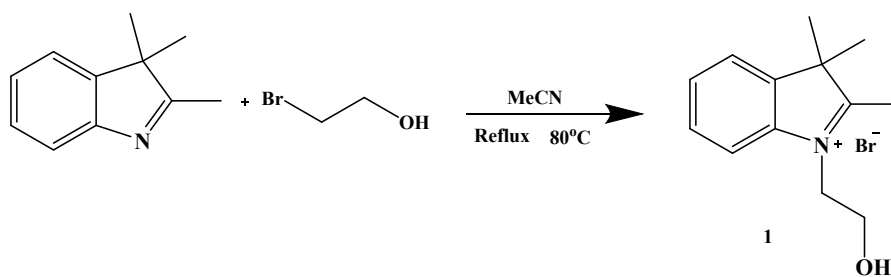

**Scheme S1** The synthesis route of indole (1).

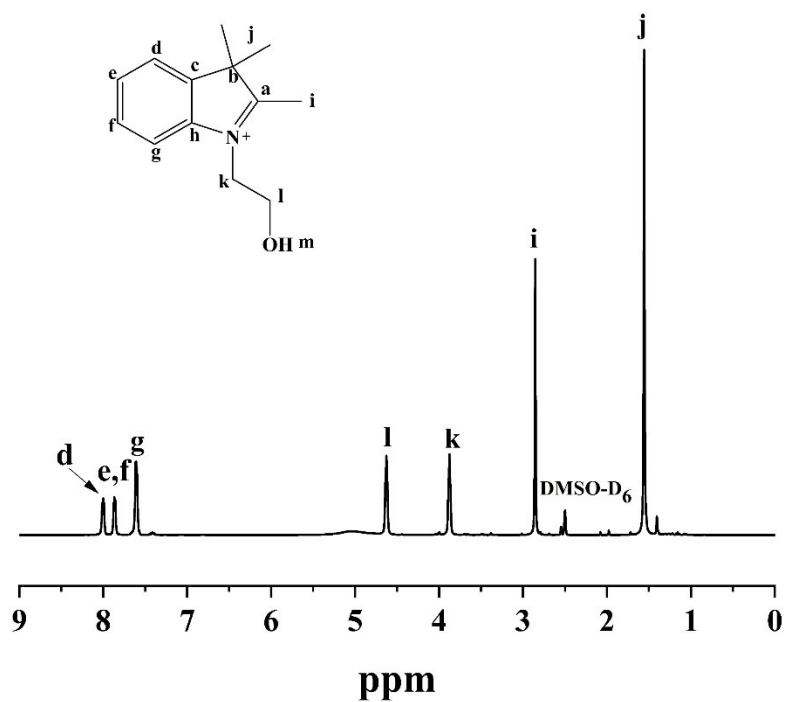

**Figure S1**  $^1\text{H}$  NMR spectrum of indole (1).

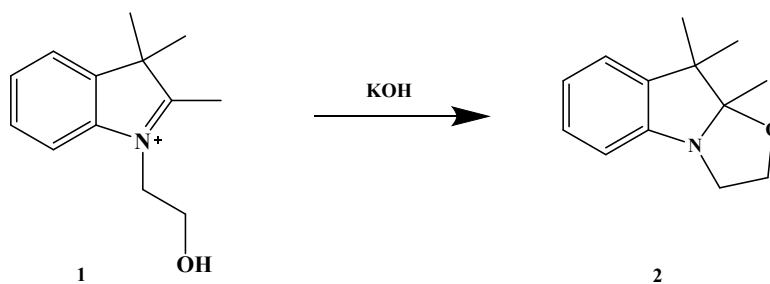

**Scheme S2** The synthesis route of indole (2).

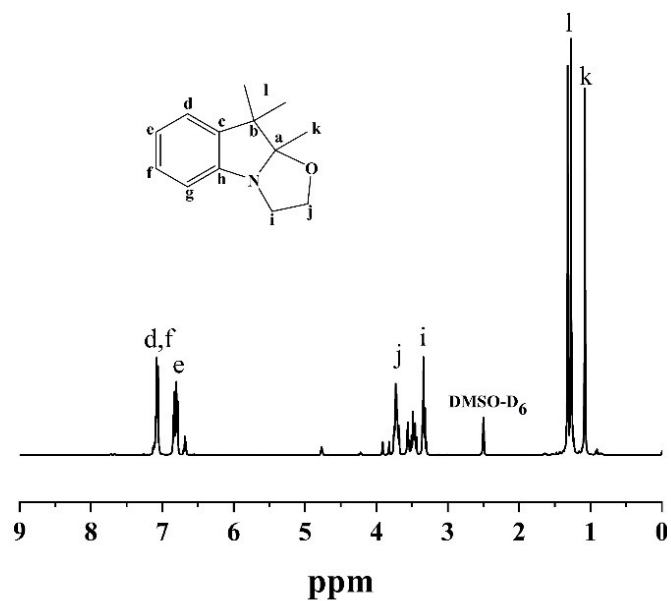

**Figure S2**  $^1\text{H}$  NMR spectrum of indole (2).

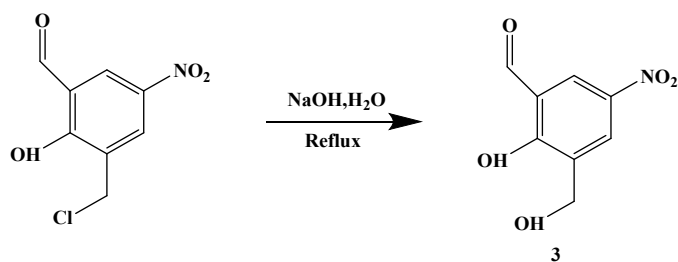

**Scheme S3** The synthesis route of salicylaldehyde (3).

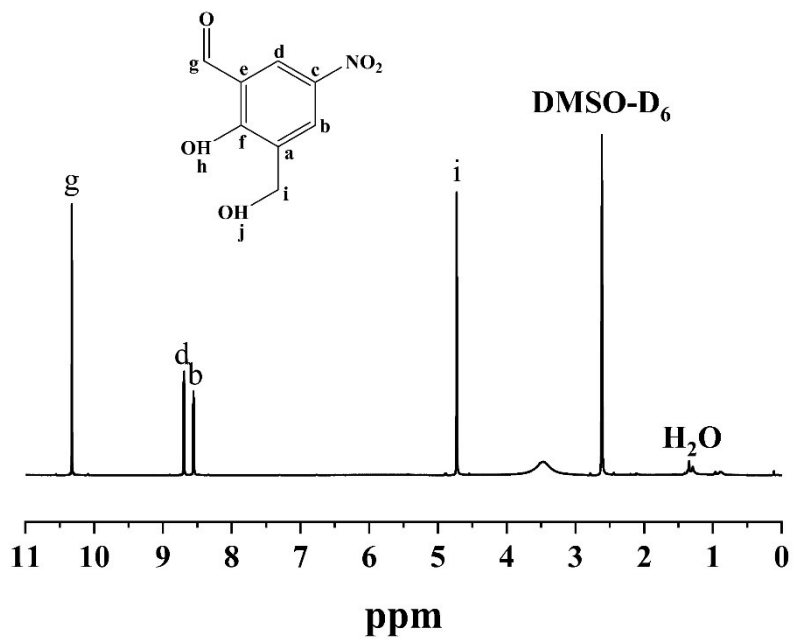

**Figure S3**  $^1\text{H}$  NMR spectrum of salicylaldehyde (3).

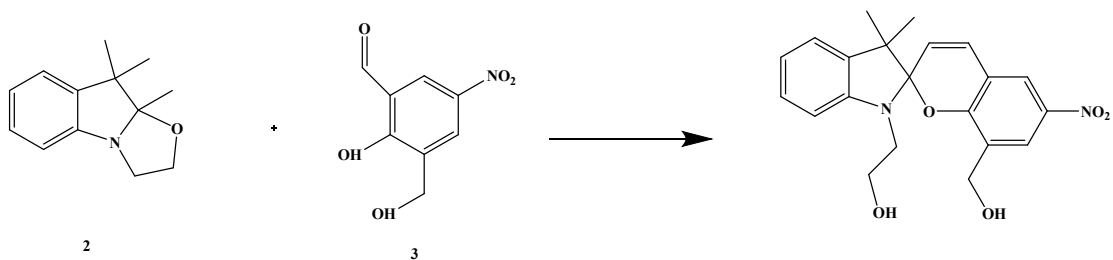

**Scheme S4** The synthesis route of spiropyran (4).

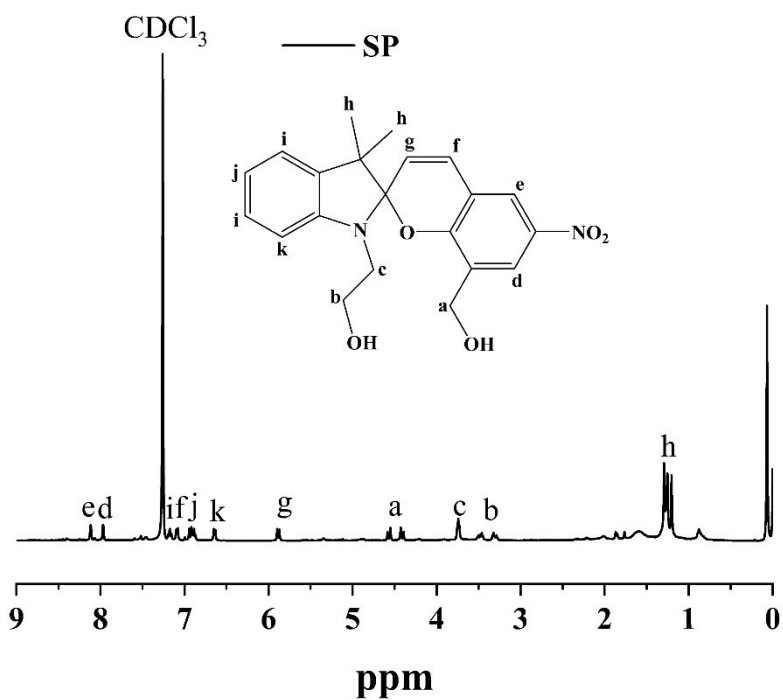

**Figure S4**  $^1\text{H}$  NMR spectrum of spiropyran (4).

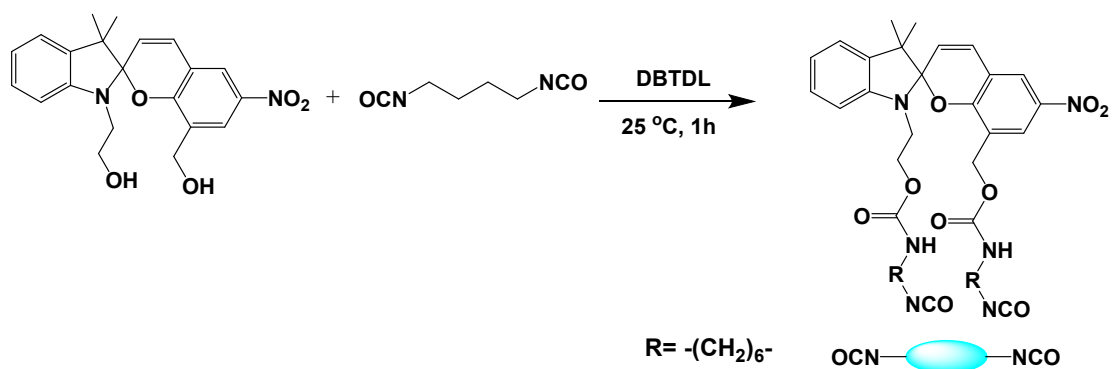

**Scheme S5** The synthesis route of NCO-SP-NCO.

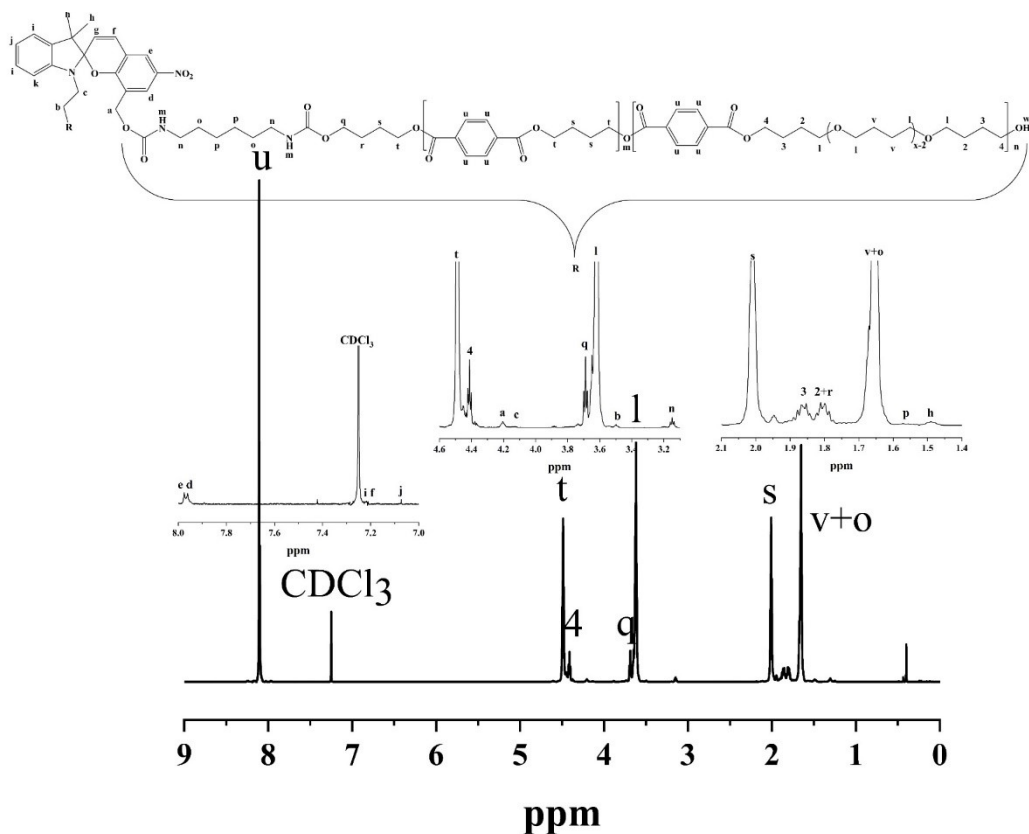

**Figure S5** The  $^1\text{H}$  NMR spectrum of PBT-SP-PTMG850-1

$^1\text{H}$  NMR (600 MHz,  $\text{CDCl}_3$ ):  $\delta$  (ppm): 8.14 (d, 8H,  $\text{H}_u$ ), 7.97 (s, 1H,  $\text{H}_e$ ), 7.96 (s, 1H,  $\text{H}_d$ ), 7.22 (m, 2H,  $\text{H}_i$ ), 7.21 (m, 1H,  $\text{H}_f$ ), 7.07 (d, 1H,  $\text{H}_j$ ), 4.49 (m, 6H,  $\text{H}_l$ ), 4.41 (m, 4H,  $\text{H}_4$ ), 4.21 (s, 2H,  $\text{H}_a$ ), 4.13 (m, 2H,  $\text{H}_c$ ), 3.69 (m, 2H,  $\text{H}_q$ ), 3.62 (m, 4H,  $\text{H}_l$ ), 3.50 (m, 2H,  $\text{H}_b$ ), 3.15 (m, 4H,  $\text{H}_n$ ), 2.00 (m, 6H,  $\text{H}_s$ ), 1.87-1.84 (m, 4H,  $\text{H}_3$ ), 1.82-1.78 (m, 6H,  $\text{H}_{2+r}$ ), 1.65 (m, 8H,  $\text{H}_{v+o}$ ), 1.54 (m, 4H,  $\text{H}_p$ ), 1.49 (s, 6H,  $\text{H}_h$ ).

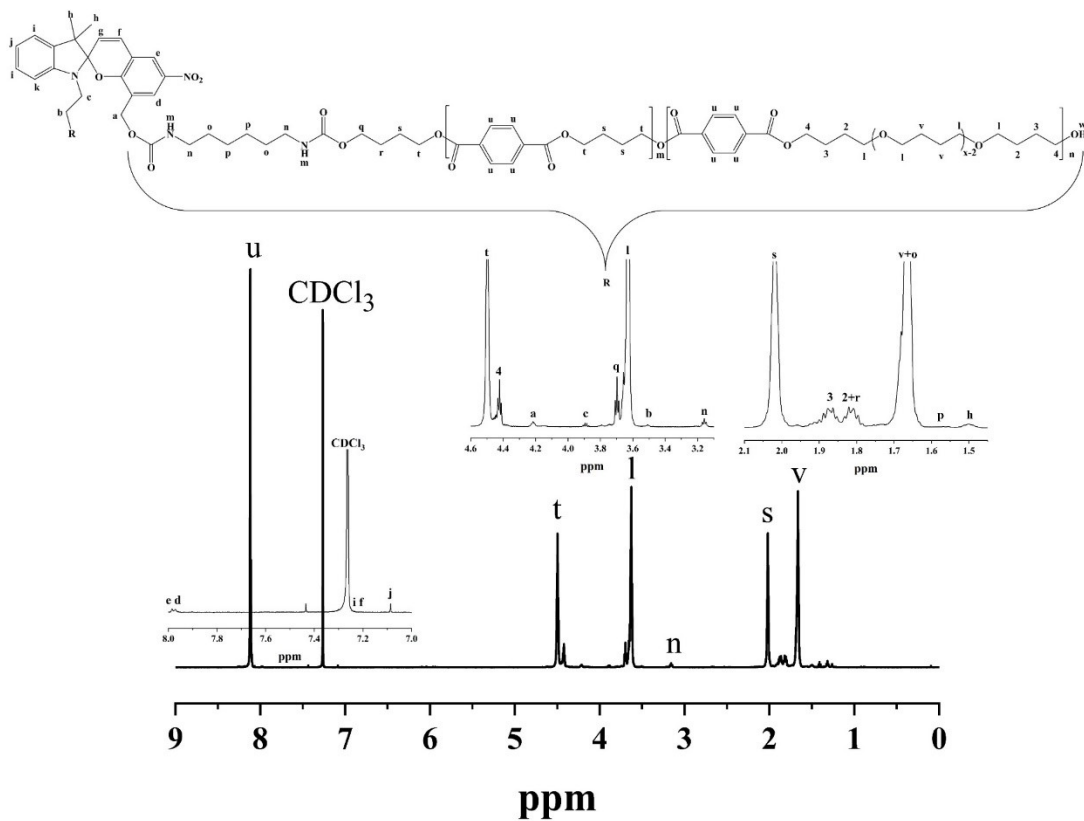

**Figure S6** The  $^1\text{H}$  NMR spectrum of PBT-SP-PTMG1000-1.

$^1\text{H}$  NMR (600 MHz,  $\text{CDCl}_3$ ):  $\delta$  (ppm): 8.14 (d, 8H,  $\text{H}_u$ ), 7.98(s, 1H,  $\text{H}_e$ ), 7.97 (s, 1H,  $\text{H}_d$ ), 7.23 (m, 2H,  $\text{H}_i$ ), 7.22 (m, 1H,  $\text{H}_f$ ), 7.09 (d, 1H,  $\text{H}_j$ ), 4.50 (m, 6H,  $\text{H}_i$ ), 4.42 (m, 4H,  $\text{H}_4$ ), 4.22 (s, 2H,  $\text{H}_a$ ), 4.14 (m, 2H,  $\text{H}_c$ ), 3.70 (m, 2H,  $\text{H}_q$ ), 3.63 (m, 4H,  $\text{H}_1$ ), 3.51 (m, 2H,  $\text{H}_b$ ), 3.16 (m, 4H,  $\text{H}_n$ ), 2.02 (m, 6H,  $\text{H}_s$ ), 1.89-1.85 (m, 4H,  $\text{H}_3$ ), 1.82-1.80 (m, 6H,  $\text{H}_{2+r}$ ), 1.66 (m, 8H,  $\text{H}_{v+o}$ ), 1.56 (m, 4H,  $\text{H}_p$ ), 1.50 (s, 6H,  $\text{H}_h$ ).

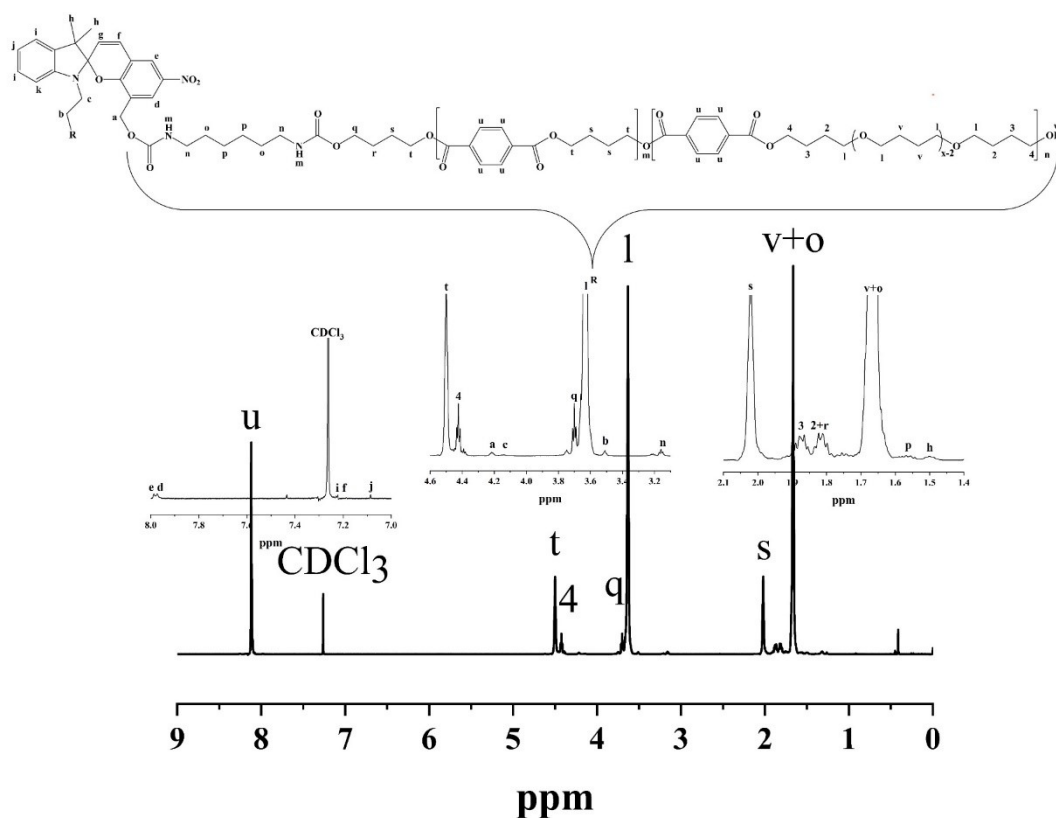

**Figure S7** The  $^1\text{H}$  NMR spectrum of PBT-SP-PTMG2000-1

$^1\text{H}$  NMR (600 MHz,  $\text{CDCl}_3$ ):  $\delta$  (ppm): 8.14 (d, 8H,  $\text{H}_u$ ), 7.98 (s, 1H,  $\text{H}_e$ ), 7.97 (s, 1H,  $\text{H}_d$ ), 7.23 (m, 2H,  $\text{H}_i$ ), 7.22 (m, 1H,  $\text{H}_f$ ), 7.09 (d, 1H,  $\text{H}_j$ ), 4.50 (m, 6H,  $\text{H}_l$ ), 4.42 (m, 4H,  $\text{H}_4$ ), 4.22 (s, 2H,  $\text{H}_a$ ), 4.14 (m, 2H,  $\text{H}_c$ ), 3.70 (m, 2H,  $\text{H}_q$ ), 3.63 (m, 4H,  $\text{H}_1$ ), 3.51 (m, 2H,  $\text{H}_b$ ), 3.16 (m, 4H,  $\text{H}_n$ ), 2.02 (m, 6H,  $\text{H}_s$ ), 1.89-1.85 (m, 4H,  $\text{H}_3$ ), 1.82-1.80 (m, 6H,  $\text{H}_{2+r}$ ), 1.66 (m, 8H,  $\text{H}_{v+o}$ ), 1.56 (m, 4H,  $\text{H}_p$ ), 1.50 (s, 6H,  $\text{H}_h$ ).

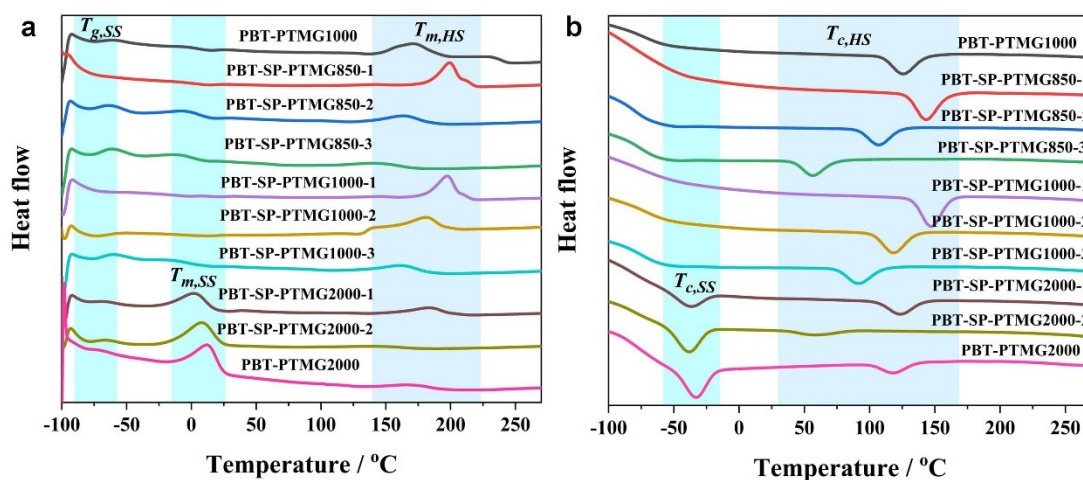

**Figure S8** DSC thermograms for elastomers with SP and without SP; (a) heating ramp and (b) cooling (crystallization) ramp.

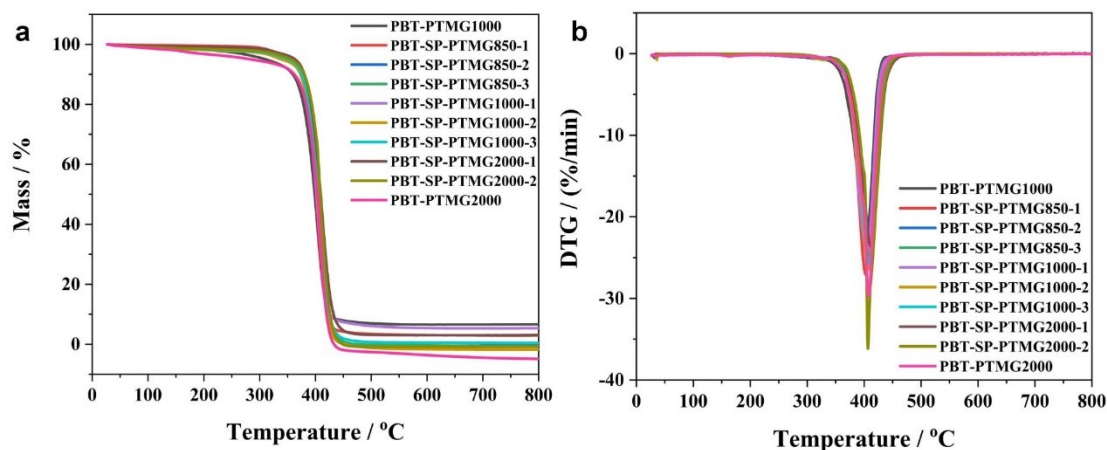

Figure S9 Thermogravimetric analysis (TGA) of elastomers.

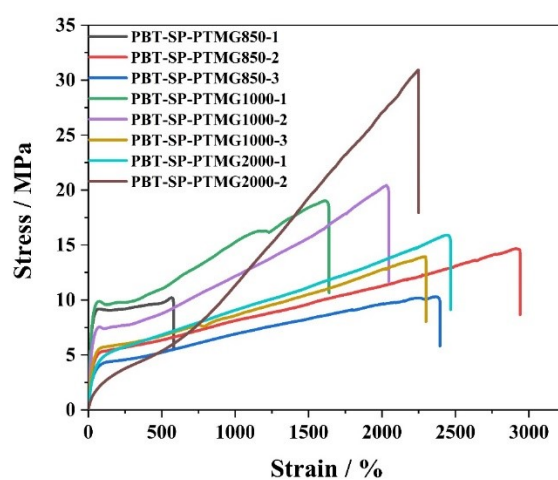

Figure S10 Representative stress-strain curves of elastomers.

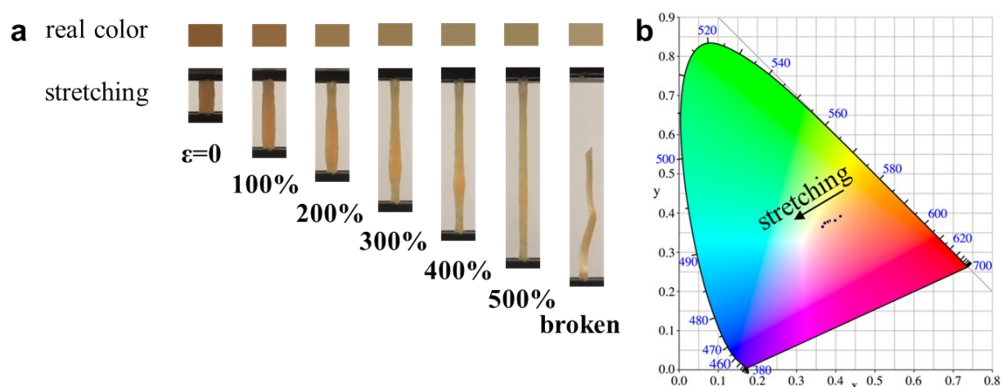

Figure S11 (a) Snapshots of PBT-SP-PTMG850-1 during tensile testing. (b) The strain-induced color changes in the CIE  $xy$  chromaticity diagram during the elastomer stretching.



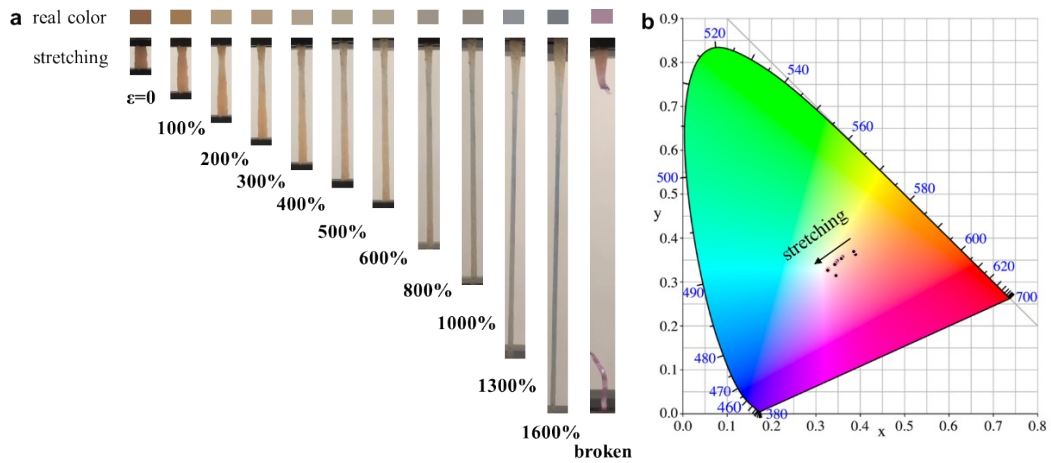

**Figure S12** (a) Snapshots of PBT-SP-PTMG850-2 during tensile testing. (b) The strain-induced color changes in the CIE  $xy$  chromaticity diagram during the elastomer stretching.

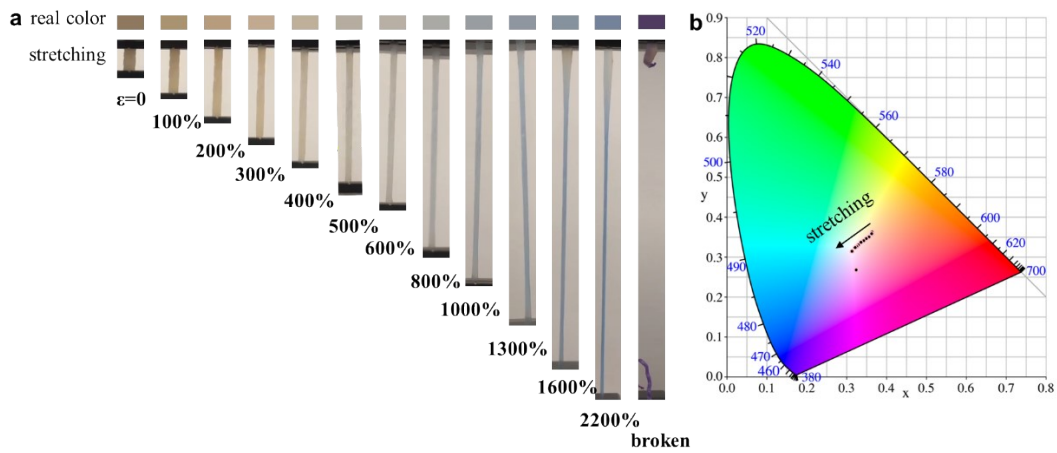

**Figure S13** (a) Snapshots of PBT-SP-PTMG850-3 during tensile testing. (b) The strain-induced color changes in the CIE  $xy$  chromaticity diagram during the elastomer stretching.

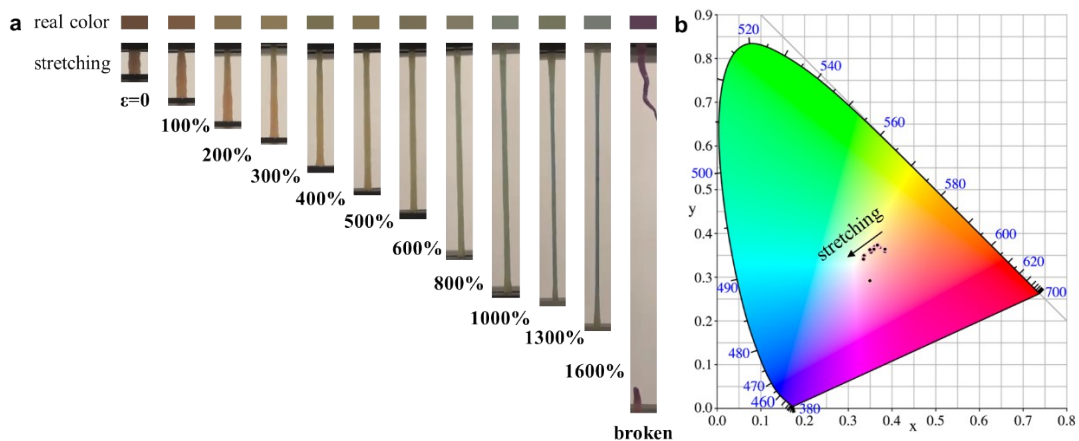

**Figure S14** (a) Snapshots of PBT-SP-PTMG1000-2 during tensile testing. (b) The

strain-induced color changes in the CIE  $xy$  chromaticity diagram during the elastomer stretching.

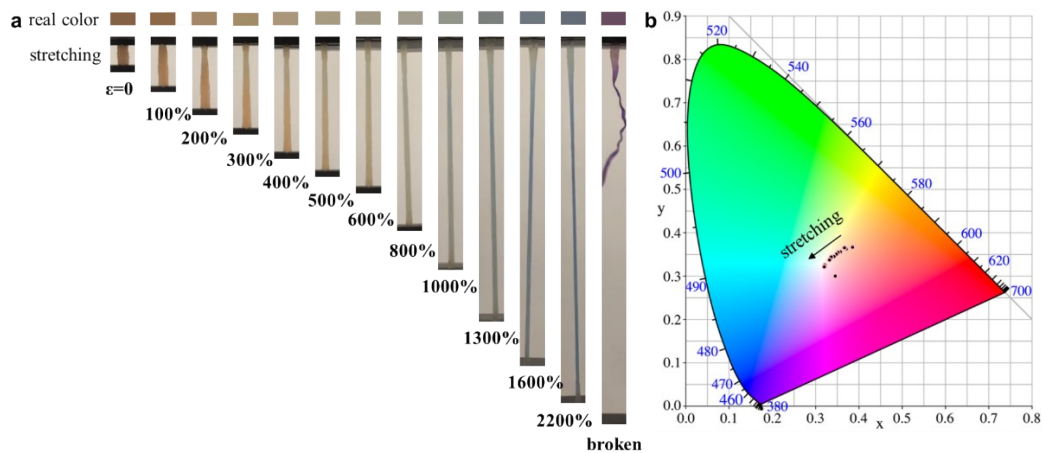

**Figure S15** (a) Snapshots of PBT-SP-PTMG1000-3 during tensile testing. (b) The strain-induced color changes in the CIE  $xy$  chromaticity diagram during the elastomer stretching.

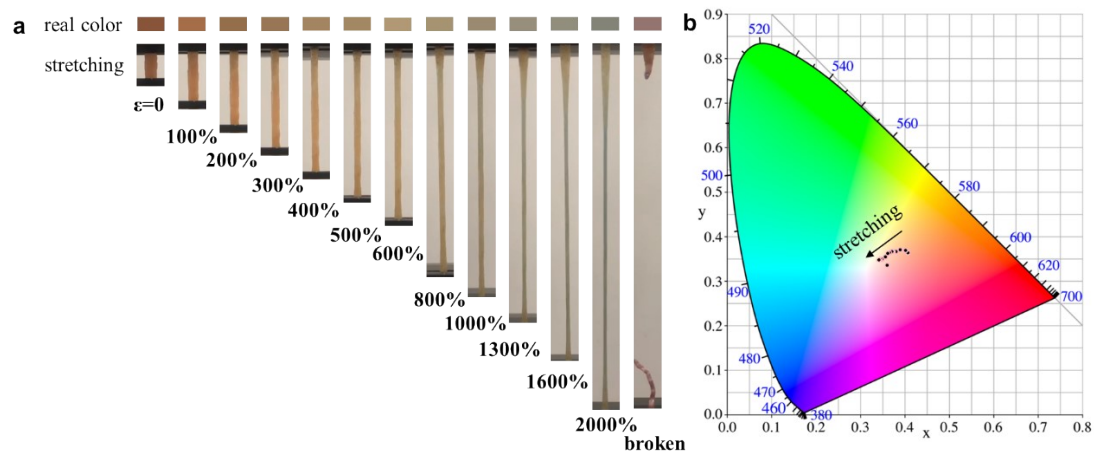

**Figure S16** (a) Snapshots of PBT-SP-PTMG2000-1 during tensile testing. (b) The strain-induced color changes in the CIE  $xy$  chromaticity diagram during the elastomer stretching.

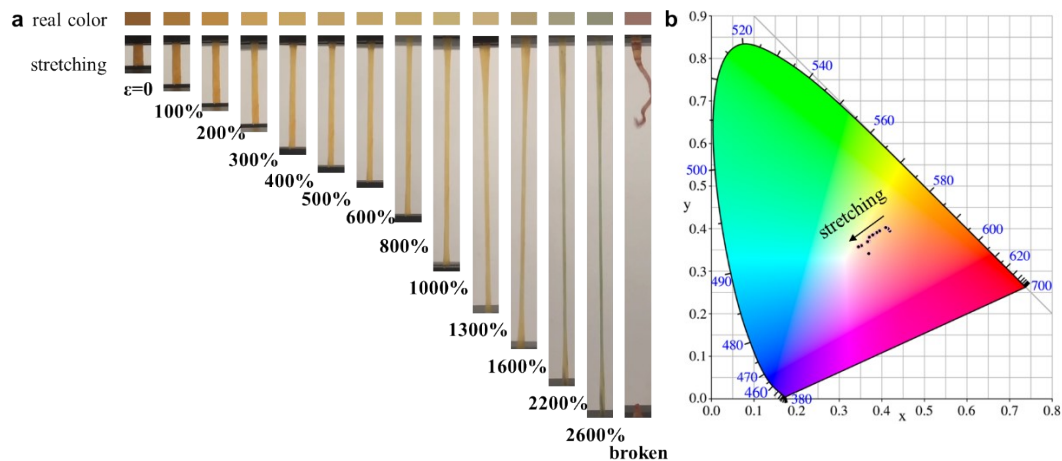

**Figure S17** (a) Snapshots of PBT-SP-PTMG2000-2 during tensile testing. (b) The strain-induced color changes in the CIE  $xy$  chromaticity diagram during the elastomer stretching.

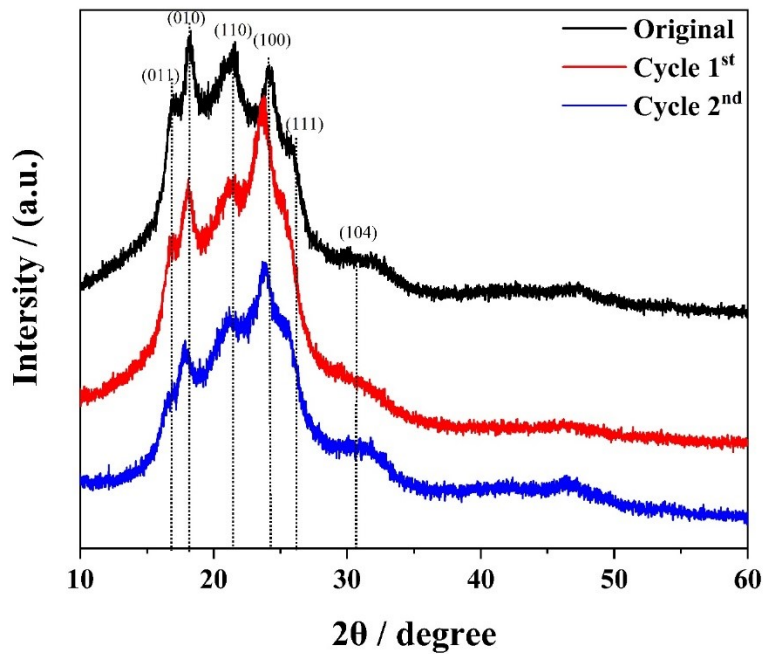

**Figure S18** X-ray diffraction (XRD) profiles of PBT-SP-PTMG1000-1 before being stretched (Original), after the first (Cycle 1<sup>st</sup>) and the second (Cycle 2<sup>nd</sup>) cyclic stretching.
